# Supplementary material for: The increased tendency for anemia in traditional Chinese medicine deficient body constitution is associated with the gut microbiome
Source: Front Nutr. 2024 Sep 18;11:1359644. doi: 10.3389/fnut.2024.1359644 (PMC11445043; doi:10.3389/fnut.2024.1359644)
Supplement: Supplementary file 1 [file Table_2.XLSX]

## Sheet: Sheet1
Characteristics
Characteristic	Balance, N = 50a	Deficiency, N = 79a	p-valueb
Red blood cell indices (counts)			>0.99
Abnormal	15 (30%)	23 (29%)
Normal	35 (70%)	56 (71%)
Groups (counts)			<0.001
BalanceAbnormal	15 (30%)	0 (0%)
BalanceNormal	35 (70%)	0 (0%)
DeficiencyAbnormal	0 (0%)	23 (29%)
DeficiencyNormal	0 (0%)	56 (71%)
DSSCM (dampness syndrome scale of Chinese medicine, score)	9 (7)	22 (12)	<0.001
Age (yrs)	34 (6)	35 (6)	0.32
BMI (Body mass index, kg/m2)	21.62 (3.34)	21.01 (2.57)	0.27
SBP (Systolic blood pressure, mmHg)	113 (8)	109 (12)	0.027
DBP (Diastolic blood pressure, mmHg)	69 (6)	68 (8)	0.43
GLU (Blood glucose, mmol/L)	5.20 (0.76)	5.15 (0.55)	0.68
LDLC (Low density lipoprotein, mmol/L)	2.85 (0.68)	2.77 (0.62)	0.46
TC (Total cholesterol, mmol/L)	4.75 (0.77)	4.65 (0.71)	0.46
TG (Triglyceride, mmol/L)	0.91 (0.37)	0.88 (0.37)	0.67
HDLC (High density lipoprotein cholesterol, mmol/L)	1.53 (0.25)	1.50 (0.32)	0.5
CRP (C-reactive protein, mg/L)	1.08 (2.00)	1.03 (2.35)	0.88
NEUT (Neutrophil, 109/L)	3.50 (1.37)	3.32 (1.23)	0.46
MONO (Monocyte, 109/L)	0.38 (0.11)	0.37 (0.11)	0.92
EOSIN (Eosinophil. 109/L)	0.12 (0.10)	0.11 (0.08)	0.47
MCHC (Mean corpuscular hemoglobin concentration, g/L)	330 (9)	326 (12)	0.02
MCH (Mean corpuscular hemoglobin, pg)	29.1 (2.4)	28.9 (3.2)	0.67
MCV (Mean corpuscular volume, fL)	88 (6)	89 (8)	0.75
MPV (Meam platelet volume, fL)	10.03 (0.95)	10.32 (0.87)	0.091
LYM (Iymphocyte, 109/L)	1.98 (0.52)	1.82 (0.48)	0.086
WBC (White blood cell, 109/L)	6.01 (1.62)	5.66 (1.53)	0.22
RDW (Red blood cell distribution width, %)	12.47 (1.04)	12.63 (1.38)	0.45
HCT (Hematocrit, %)	40.11 (2.64)	39.25 (2.36)	0.065
RBC (Red blood cell, 1012/L)	4.57 (0.47)	4.47 (0.49)	0.23
PDW (Platelet distribution width, fL)	11.44 (2.08)	11.78 (2.34)	0.39
PCT (Procalcitonin, ng/mL)	0.27 (0.04)	0.26 (0.05)	0.51
PLT (Platelet, 109/L)	269 (50)	254 (57)	0.12
Hb (Hemoglobin, g/L)	132 (10)	128 (9)	0.01
TBA (μmol/L)	6.20 (7.15)	3.65 (2.27)	0.018
TP (Total protein, g/L)	74.8 (4.0)	74.7 (3.6)	0.82
IL27 (Interleukin-27, pg/mL)	697 (1,281)	566 (1,276)	0.57
a n (%); Mean (SD)
b Fisher's exact test; Welch Two Sample t-test
